# Supplementary material for: Flexible, conductive and durable hydrogels based on a gluten–poly(vinyl alcohol) complex for electrode patches and wound dressings
Source: Royal Society of Chemistry journal article supplement (doi:10.1039/d5tb02405f), 2026-01-01
Supplement: d5tb02405f1.pdf [file d5tb02405f1.pdf]

*Supplementary data*

---

**Flexible, conductive and durable hydrogels based on gluten–poly(vinyl alcohol) complex for electrode patch and wound dressing**

Xin Liu <sup>a,1</sup>, Shihao Peng <sup>a,1</sup>, Xiao Lin <sup>b</sup>, Juan Wang <sup>c</sup>, Huan Zhou <sup>a†</sup>, Lei Yang <sup>a†</sup>

<sup>a</sup> *Center for Health Science and Engineering, Hebei Key Laboratory of Biomaterials and Smart Theranostics, School of Materials Science and Engineering, Hebei University of Technology, Tianjin, 300130, China*

<sup>b</sup> *Orthopedic Institute, Department of Orthopedics, The First Affiliated Hospital, Soochow University, Suzhou, 215006, China*

<sup>c</sup> *Joint Surgery Department, Hebei Medical University Third Hospital, Shijiazhuang, 050051, China*

---

**Supplementary data**

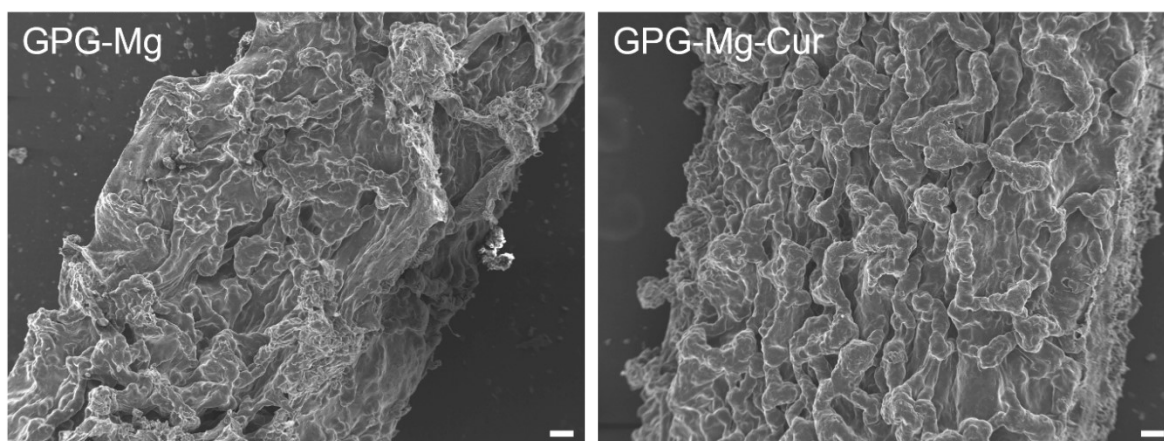

**Figure. S1** Microscopic morphology characterization of (A) GPG–Mg and (B) GPG–Mg–Cur using scanning electron microscope (50×, scale bar: 100 μm).
